# Supplementary material
Source: publisher figshare collection journal article supplement (https://gsajournals.figshare.com/ndownloader/files/13991180)
Supplement: Supplementary file 1 [file 13991180]

## Sheet: TableS15
Table S15 Statistics of predicted protein-coding genes in M. baccata using five different methods.
Gene set		Number	Average gene length (bp)	Average CDS length (bp)	Average exon per gene	Average exon length (bp)	Average intron length (bp)
Denovo	AUGUSTUS	44213	2221.02	1034.75	4.76	217.5	315.71
	GENSCAN	34821	10331.2	1279.62	6.26	204.39	1720.63
	GlimmerHMM	44669	1912.77	897.75	3.86	232.33	354.39
Homolog	P.persica	49214	2716.05	1072.42	4.27	251.35	503.14
	P.mume	49529	3031.16	1009.82	4.14	243.89	643.63
	P.bretschneideri	57570	2629.72	896.58	3.92	228.89	594.12
	M.domestica	57939	2712.64	1146.72	4.03	284.37	516.39
	F.vesca	50246	3085.11	1034.33	4.03	256.35	675.76
	A.thaliana	35171	3022.9	1102.46	4.63	238.29	529.54
EST		66332	6141.06	1075.92	3.66	294.26	1906.79
GLEAN		41569	2478.51	1093.1	4.67	233.87	377.08
Final gene set		46114	2666.94	1072.67	4.4	244.05	372.39
Note: We used five closely related Rosaceae plant species and A. thaliana to identify possible protein-coding genes during homolog search.
